# Supplementary material
Source: PubMed Central journal article supplement (PMC1500892)
Supplement: NIHMS10779-supplement-3.pdf [file NIHMS10779-supplement-3.pdf]

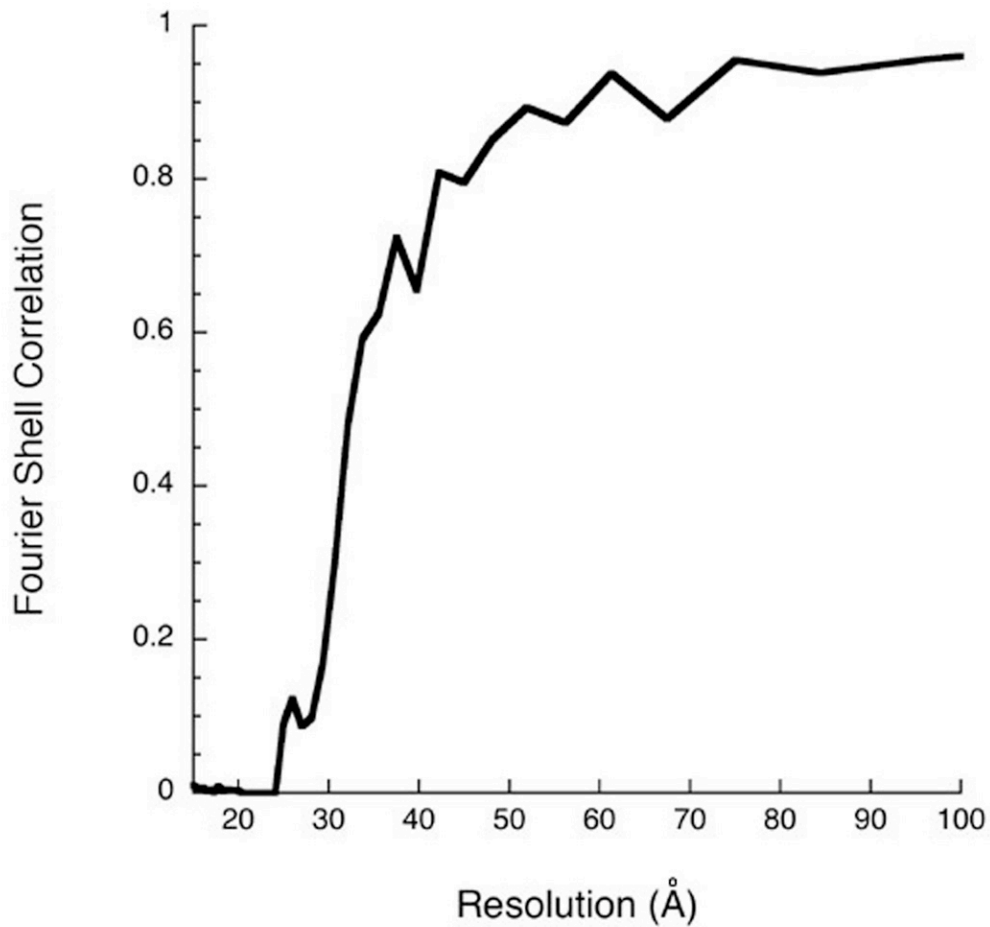

**Supplementary Figure 1.** Fourier shell correlation (FSC)<sup>1</sup> for the final reconstruction of the poliovirus-receptor-liposome complex. FSC is used to estimate the resolution of a reconstruction by splitting the dataset in half and assessing the agreement between reconstructions calculated from the two. Our 32 Å estimate of the resolution is conservative, having been based on an FSC value of 0.5.

## REFERENCES

1. Saxton, W.O. & Baumeister, W. The correlation averaging of regularly arranged bacterial cell envelope protein. *J. Microscopy* **127**, 127-138 (1982).
